# Supplementary material for: Mutation in Mg-Protoporphyrin IX Monomethyl Ester Cyclase Decreases Photosynthesis Capacity in Rice
Source: PubMed Central journal article supplement (PMC5271374; doi:10.1371/journal.pone.0171118), 2017-01-27
Supplement: pone.0171118.s001.pdf [file pone.0171118.s001.pdf]

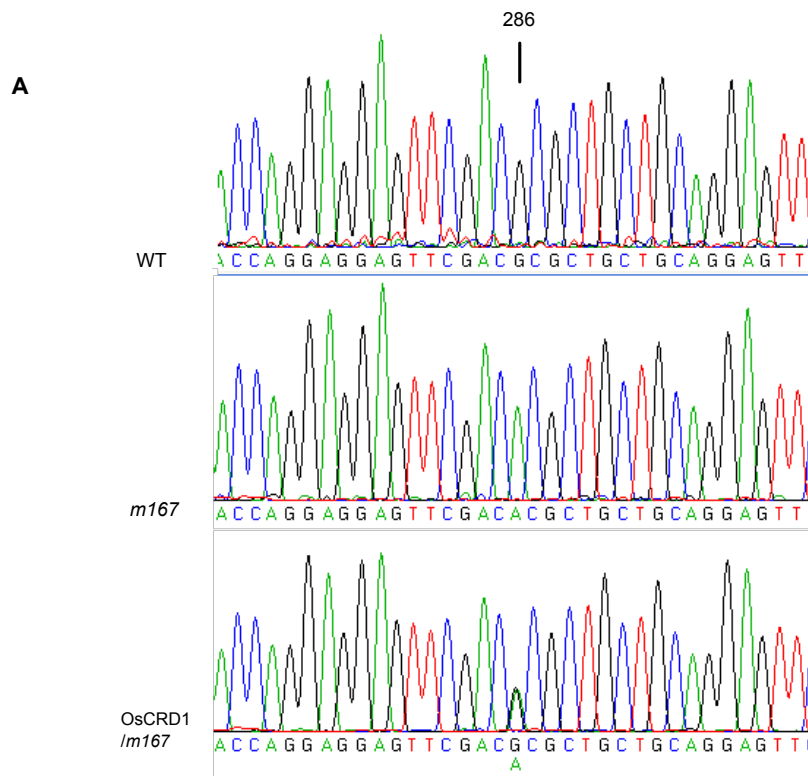

**B**

|              | target 1                        | target 2                            |
|--------------|---------------------------------|-------------------------------------|
| wt           | GGCCTCCTCCGCCATGGAGCTCTCCCTCCT  | TACTGGAGGTACATCACCATCTTCAGGCAC      |
| OsCRD1-2gR-1 | GGCCTCCTCCGCC --GGAGCTCTCCCTCCT | TACTGGAGGTACATCAC - - - - TTCAGGCAC |

1

2 **S1 Fig. Sequencing confirmation for complementation of *m167* with WT**

3 ***OsCRD1* genomic sequence (A) and knocking out of *OsCRD1* in WT rice (B).**
