# Supplementary material for: Mutation in Mg-Protoporphyrin IX Monomethyl Ester Cyclase Decreases Photosynthesis Capacity in Rice
Source: PubMed Central journal article supplement (PMC5271374; doi:10.1371/journal.pone.0171118), 2017-01-27
Supplement: pone.0171118.s002.pdf [file pone.0171118.s002.pdf]

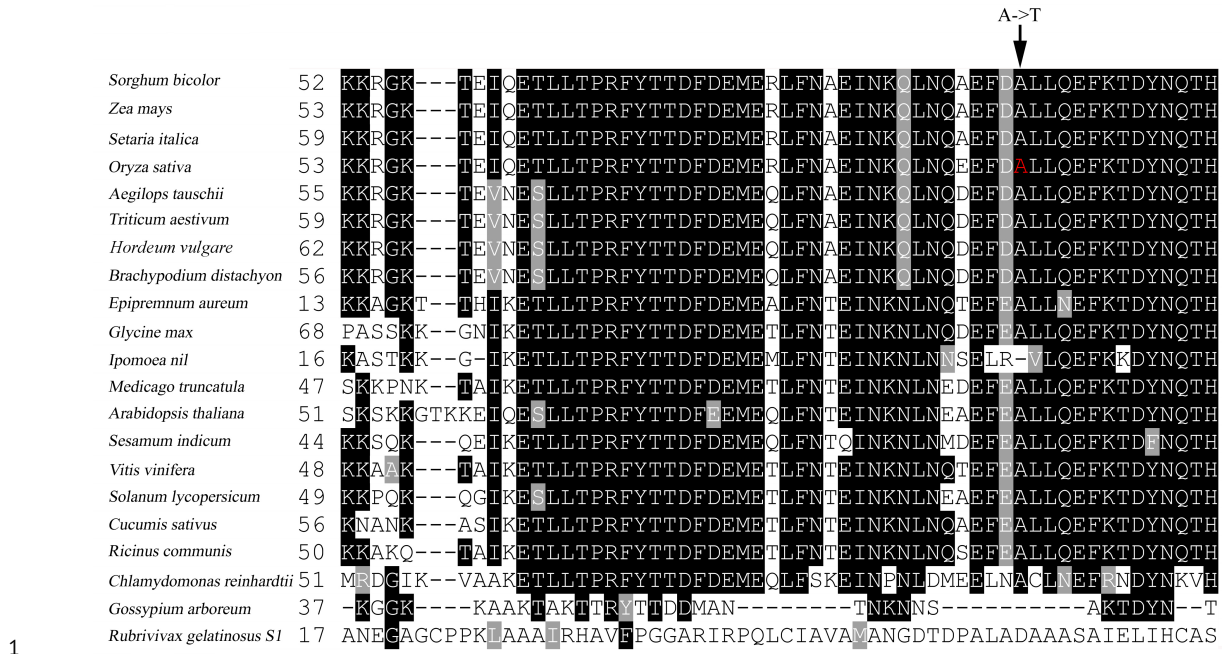

2 **S2 Fig. Sequence alignment of OsCRD1 protein and its related proteins.**

3 Alignment of the OsCRD1 protein and its related proteins from other plants by  
 4 NCBI-BLAST. Conserved residues or similarity of the aligned sequences are depicted  
 5 in the consensus sequence with lower case. Accession numbers: XP\_002457655.1  
 6 for *Sorghum bicolor*, XP\_008655474.1 for *Zea mays*, XP\_004967679.1 for *Setaria italic*,  
 7 NP\_001042745.1 for *Oryza sativa*, EMT08710 for *Aegilops tauschii*, CDM82987 for  
 8 *Triticum aestivum*, Q5EFU4.1 for *Xanthal*, XP\_003567276 for *Brachypodium distachyon*,  
 9 ACX54448 for *Epipremnum aureum*, XP\_003521093 for *Glycine max*, AAB19120.1  
 10 for *Ipomoea nil*, XP\_003624856.1 for *Medicago truncatula*, NP\_191253.1 for *Ara-*  
 11 *bidopsis thaliana*, XP\_011070036 for *Sesamum indicum*, XP\_002283892.1 for *Vitis*  
 12 *vinifera*, XP\_004249099.1 for *Solanum lycopersicum*, XP\_004144646 for *Cucumis sativus*,  
 13 XP\_002523677 for *Ricinus communis*, XP\_001692557.1 for *Chlamydomonas reinhardtii*,

14 KHG30795.1 for *Gossypium arboretum*, AAO93113.1 for *Rubrivivax gelatinosus* S1.
