# Supplementary material for: Mutation in Mg-Protoporphyrin IX Monomethyl Ester Cyclase Decreases Photosynthesis Capacity in Rice
Source: PubMed Central journal article supplement (PMC5271374; doi:10.1371/journal.pone.0171118), 2017-01-27
Supplement: pone.0171118.s003.pdf [file pone.0171118.s003.pdf]

|                       |     |                                                                                                                                  |
|-----------------------|-----|----------------------------------------------------------------------------------------------------------------------------------|
| <i>Ningjing16</i>     | 414 | AGCTCAACCA GGA GGA GTTCGA CGCGCTGCTGCA GGA GTTCAA GACGGA CTATAACCA GA                                                            |
| <i>m167</i>           | 410 | AGCTCAACCA GGA GGA GTTCGAC <span style="background-color: red; color: black;">A</span> CGCTGCTGCA GGA GTTCAA GACGGA CTATAACCA GA |
| <i>Kitaake</i>        | 413 | AGCTCAACCA GGA GGA GTTCGA CGCGCTGCTGCA GGA GTTCAA GACGGA CTATAACCA GA                                                            |
| <i>Peiai64</i>        | 413 | AGCTCAACCA GGA GGA GTTCGA CGCGCTGCTGCA GGA GTTCAA GACGGA CTATAACCA GA                                                            |
| <i>Yangdao6</i>       | 414 | AGCTCAACCA GGA GGA GTTCGAC CGCGCTGCTGCA GGA GTTCAA GACGGA CTATAACCA GA                                                           |
| <i>ZD13</i>           | 413 | AGCTCAACCA GGA GGA GTTCGAC CGCGCTGCTGCA GGA GTTCAA GACGGA CTATAACCA GA                                                           |
| <i>02428</i>          | 414 | AGCTCAACCA GGA GGA GTTCGA CGCGCTGCTGCA GGA GTTCAA GACGGA CTATAACCA GA                                                            |
| <i>Dular</i>          | 414 | AGCTCAACCA GGA GGA GTTCGA CGCGCTGCTGCA GGA GTTCAA GACGGA CTATAACCA GA                                                            |
| <i>Zhonghua17</i>     | 413 | AGCTCAACCA GGA GGA GTTCGA CGCGCTGCTGCA GGA GTTCAA GACGGA CTATAACCA GA                                                            |
| <i>Baishoumao</i>     | 419 | AGCTCAACCA GGA GGA GTTCGA CGCGCTGCTGCA GGA GTTCAA GACGGA CTATAACCA GA                                                            |
| <i>D115</i>           | 416 | AGCTCAACCA GGA GGA GTTCGAC CGCGCTGCTGCA GGA GTTCAA GACGGA CTATAACCA GA                                                           |
| <i>Xiangwanxian13</i> | 413 | AGCTCAACCA GGA GGA GTTCGA CGCGCTGCTGCA GGA GTTCAA GACGGA CTATAACCA GA                                                            |
| <i>Consensus</i>      | 421 | AGCTCAACCA GGA GGA GTTCGA CgCGCTGCTGCA GGA GTTCAA GACGGA CTATAACCA GA                                                            |

1

2 **S3 Fig. Sequence analysis of OsCRD1 in different rice varieties.**
