# Supplementary material for: Mutation in Mg-Protoporphyrin IX Monomethyl Ester Cyclase Decreases Photosynthesis Capacity in Rice
Source: PubMed Central journal article supplement (PMC5271374; doi:10.1371/journal.pone.0171118), 2017-01-27
Supplement: pone.0171118.s004.pdf [file pone.0171118.s004.pdf]

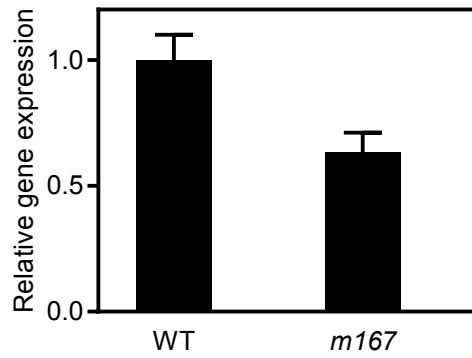

1

2 **S4 Fig. Expression of *OsCRD1* gene in 2-week seedlings of WT and *m167*.**

3 Expression of *OsCRD1* in leaves was analyzed using quantitative RT-PCR. *Actin*

4 gene was used as a control. Data are means  $\pm$  SD ( $n = 3$ ).
