# Supplementary material for: Mutation in Mg-Protoporphyrin IX Monomethyl Ester Cyclase Decreases Photosynthesis Capacity in Rice
Source: PubMed Central journal article supplement (PMC5271374; doi:10.1371/journal.pone.0171118), 2017-01-27
Supplement: pone.0171118.s005.pdf [file pone.0171118.s005.pdf]

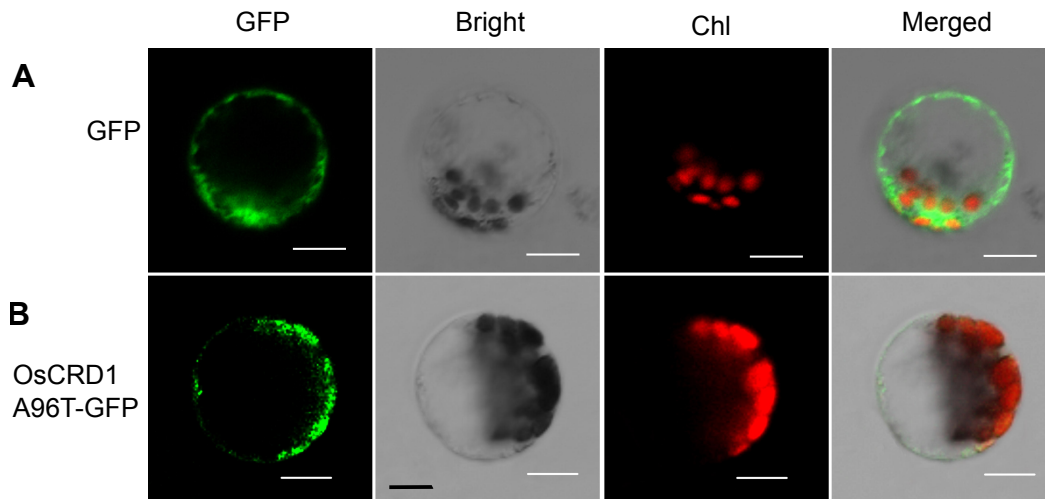

1

2 **S5 Fig. Subcellular localization of OsCRD1A96T in rice protoplasts.**
